# Supplementary material for: Preparation, characterization and catalytic activity of core–satellite Au/Pdop/SiO2/Fe3O4 magnetic nanocomposites
Source: Royal Society of Chemistry journal article supplement (doi:10.1039/c3ra41537f), 2013-01-01
Supplement: c3ra41537f.pdf [file c3ra41537f.pdf]

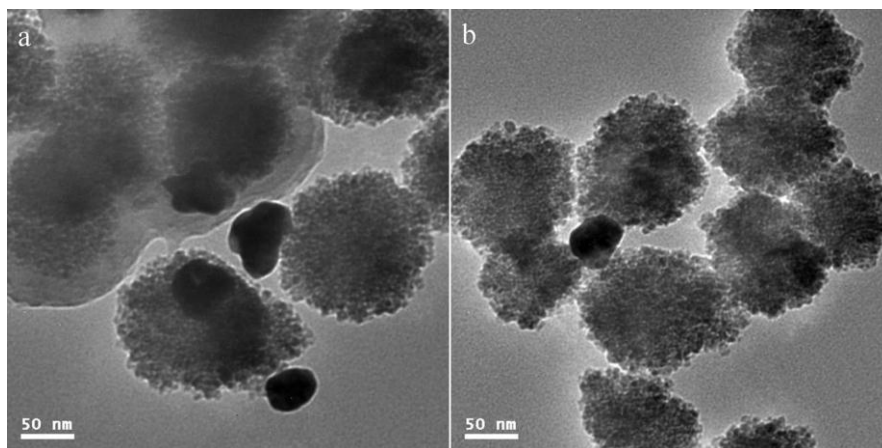

Figure S1 TEM images of the as-prepared Au/Pdop/ Fe<sub>3</sub>O<sub>4</sub> NPs with 0.3 mM HAuCl<sub>4</sub>

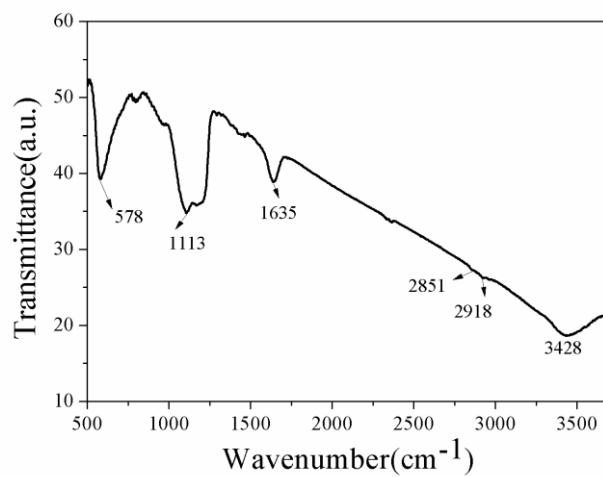

Figure S2 The IR of Pdop@SiO<sub>2</sub>@Fe<sub>3</sub>O<sub>4</sub>

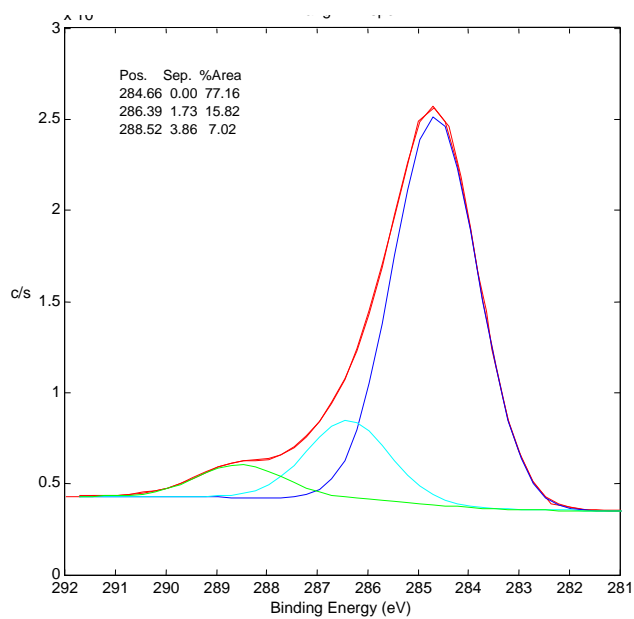

Figure S3 X-ray photoelectron spectrum of C1s for Au/Pdop/SiO<sub>2</sub>/ Fe<sub>3</sub>O<sub>4</sub> NPs.

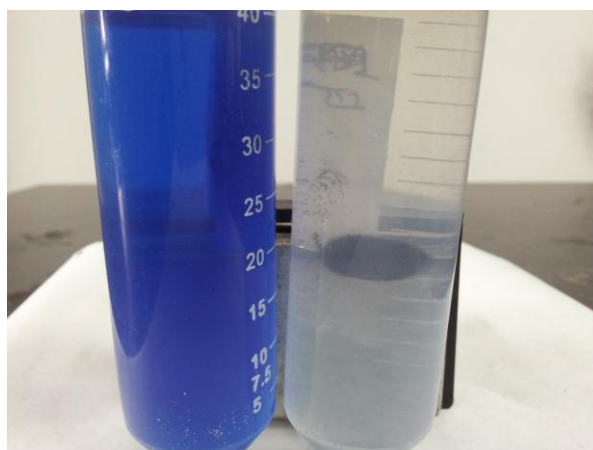

Figure S4 the optical image of original MB(left)and the remaining solution(right) after catalyzed by Au/Pdop/SiO<sub>2</sub>/ Fe<sub>3</sub>O<sub>4</sub> NPs

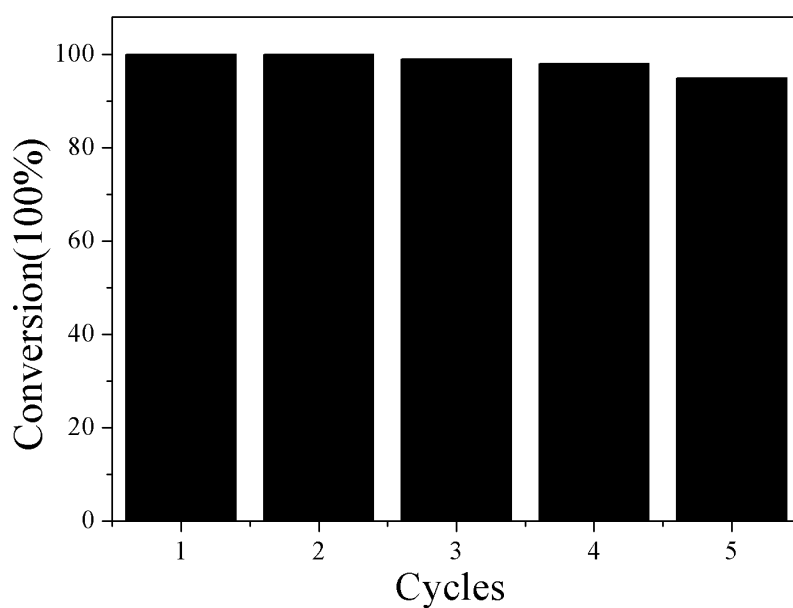

Figure S5 Recycle experiment of degradation of MB after catalyzed by Au/Pdop/SiO<sub>2</sub>/Fe<sub>3</sub>O<sub>4</sub> NPs
